1 **Title Page**

2 \*Amna Tariq, MPH, Department of Population Health Sciences, School of Public Health, Georgia  
3 State University, Atlanta, GA, USA

4 Eduardo A. Undurraga, Doctorate, Escuela de Gobierno, Pontificia Universidad Católica de Chile  
5 and Millennium Initiative for Collaborative Research in Bacterial Resistance (MICROB-R),  
6 Chile

7 Carla Castillo Laborde, MSc., Centro de Epidemiología y Políticas de Salud, Facultad de  
8 Medicina, Clínica Alemana Universidad del Desarrollo, Santiago, Chile

9 Katia Vogt-Geisse, Ph.D., Facultad de Ingeniería y Ciencias, Universidad Adolfo Ibáñez,  
10 Santiago, Chile

11 Ruiyan Luo, Ph.D., Department of Population Health Sciences, School of Public Health, Georgia  
12 State University, Atlanta, GA, USA

13 Richard Rothenberg, MD, MPH, Department of Population Health Sciences, School of Public  
14 Health, Georgia State University, Atlanta, GA, USA

15 Gerardo Chowell, Ph.D., Department of Population Health Sciences, School of Public Health,  
16 Georgia State University, Atlanta, GA, USA

17 Correspondence should be addressed to: \*Amna Tariq, Department of Population Health Sciences,  
18 Georgia State University School of Public Health, Atlanta GA, 30303, [atariq1@student.gsu.edu](mailto:atariq1@student.gsu.edu)

19 Contact number: 470-985-6352

20 Research Article

21 Abstract word count = 150 words

22 Text word count= 3095 words

23 Figures= 5

24 Table= 1

25 **Article Summary Line:** COVID-19 epidemic shows an early sub-exponential growth trend and  
26 sustained transmission of SARS-CoV-2 in Chile despite early control interventions, underscoring  
27 the need for persistent social distancing and active case finding efforts.

28 **Running Title:** Early transmission dynamics of COVID-19 in Chile

29 **Keywords:** COVID-19, SARS-CoV-2, Generalized growth model, Sub-epidemic wave model,  
30 Interventions

31 **Title:** Early transmission dynamics of COVID-19 in Chile: From sub-exponential ascending  
32 growth dynamics to a stationary disease wave, March-April, 2020

33 **Authors:** Amna Tariq, Eduardo A. Undurraga, Carla Castillo Laborde, Katia Vogt-Geisse,  
34 Ruiyan Luo, Richard Rothenberg, Gerardo Chowell

35 **Affiliations:** School of Public Health, Georgia State University, Atlanta, GA, USA (A. Tariq, R.  
36 Luo, R. Rothenberg, G. Chowell), Escuela de Gobierno, Pontificia Universidad Católica de Chile  
37 (E. A. Undurraga), Millennium Initiative for Collaborative Research in Bacterial Resistance  
38 (MICROB-R), Chile (E. A. Undurraga), Centro de Epidemiología y Políticas de Salud, Clínica  
39 Alemana Universidad del Desarrollo, Santiago, Chile (C. C. Laborde), Facultad de Ingeniería y  
40 Ciencias, Universidad Adolfo Ibáñez, Santiago, Chile (K. V. Geisse)

41 **Email addresses:** A. Tariq ([atariq1@student.gsu.edu](mailto:atariq1@student.gsu.edu)), E. A. Undurraga ([eundurra@uc.cl](mailto:eundurra@uc.cl)), C. C.  
42 Laborde ([carlacastillo@udd.cl](mailto:carlacastillo@udd.cl)), K. V. Geisse ([katia.vogt@uai.cl](mailto:katia.vogt@uai.cl)), R. Luo ([rluo@gsu.edu](mailto:rluo@gsu.edu)) , R.  
43 Rothenberg ([rrothenberg@gsu.edu](mailto:rrothenberg@gsu.edu)), G. Chowell ([gchowell@gsu.edu](mailto:gchowell@gsu.edu))

44

45

46

47 **Abstract**

48 The COVID-19 pandemic reached Latin America in February 2020, with the first case in Chile  
49 identified on March 3<sup>rd</sup>, 2020. Since then Chile has accumulated a total of 14365 cases as of  
50 April 28<sup>th</sup>, 2020. We estimate the reproduction number during the early transmission phase in  
51 Chile and study the effectiveness of control interventions by conducting short-term forecasts  
52 based on early transmission dynamics of COVID-19. The incidence curve displays sub-  
53 exponential growth dynamics with the scaling of growth parameter,  $p$ , estimated at 0.8 (95% CI:  
54 0.7, 0.8) and the reproduction number estimated at 1.6 (95% CI: 1.5, 1.6). The sub-epidemic  
55 model indicates a stationary wave of stable epidemic size. Our current findings point to sustained  
56 transmission of SARS-CoV-2 in Chile. While the social distancing interventions have slowed the  
57 virus spread, the number of new COVID-19 cases continue to accrue, underscoring the need for  
58 persistent social distancing efforts to control the epidemic.

59

60

61

62

63

64

65

66

67

68

69

70 **Main text**

71 **Introduction**

72 The coronavirus disease 2019 (COVID-19) caused by Severe Acute Respiratory Syndrome  
73 Coronavirus 2 (SARS-CoV-2) was declared a global pandemic by the WHO (World Health  
74 Organization) on March 11<sup>th</sup>, 2020 (1). This highly contagious unprecedented virus has impacted  
75 government and public institutions, strained the health care systems, restricted people in their  
76 homes and caused country-wide lock downs resulting in a global economic crisis. Moreover, as of  
77 May 2<sup>nd</sup>, 2020, more than 3 million COVID-19 cases in 210 countries and territories have been  
78 recorded, including more than 200,000 deaths (2). The social, economic and psychological impact  
79 of this pandemic on much of the world's population is profound (3).

80 Soon after its initial rapid spread in China, the first case of novel coronavirus beyond China  
81 was reported in Thailand on January 13<sup>th</sup>, 2020 (4). The first case in the USA was not identified  
82 until January 20<sup>th</sup>, 2020 followed by the detection of the first cases in the European territory on  
83 January 24<sup>th</sup>, 2020 (5, 6). The COVID-19 pandemic has since spread to every continent except the  
84 Antarctica. While some countries like Australia and New Zealand have steadily suppressed the  
85 COVID-19 spread as of April 20<sup>th</sup>, 2020, reporting ~0-17 cases per day, other countries like Italy,  
86 Spain and the US still struggle to contain the increasing number of cases (7). Subsequently,  
87 considerable COVID-19 outbreaks have occurred in Latin America since late February 2020, with  
88 61888 cases reported in Brazil, followed by 27517 cases in Peru, 23240 cases in Ecuador, 14677  
89 cases in Mexico and 14365 cases in Chile as of April 28<sup>th</sup>, 2020 (7, 8). The first case of SARS-  
90 CoV-2 in Chile was identified on March 3<sup>rd</sup>, 2020. While the initial cases were imported from  
91 South East Asia and Europe, the COVID-19 case counts have expanded in this country, placing

92 Chile in phase 4 of the pandemic and surpassing 1000 reported cases of the novel coronavirus on  
93 March 25<sup>th</sup>, 2020 (9).

94 Chile is the fifth country in Latin America after Brazil, Mexico, Ecuador and Argentina to  
95 report COVID-19 cases. The first six imported cases were reported in the city of Talca and the  
96 capital of Chile, Santiago (10). However, since the early phase of the outbreak, Chile has employed  
97 an agile public health response by announcing a ban on large public health gatherings of more than  
98 500 people on March 13<sup>th</sup>, 2020 when the nationwide cumulative case count reached 44 reported  
99 cases (11). Moreover, the Chilean government announced the closure of all day cares, schools and  
100 universities on March 16<sup>th</sup>, 2020. This was followed by the announcement to close country borders  
101 on March 18<sup>th</sup>, 2020, and the declaration of national emergency on the same date, which was  
102 accompanied with several concrete interventions to further contain the outbreak in the region (12,  
103 13). In particular, this has been followed by a night time curfew in Chile as of March 22<sup>nd</sup>, 2020,  
104 and intermittent targeted lockdowns (i.e., lockdown goes on and off at the municipality level  
105 depending on total cases and case growth) starting on March 28<sup>th</sup> in two municipalities in Southern  
106 Chile and seven municipalities in Santiago (13). Chile has accumulated a total of 14365 reported  
107 cases including 207 deaths as of April 28<sup>th</sup>, 2020. The majority of these cases are concentrated in  
108 Chile's capital, Santiago, with 8300 reported cases and the Araucanía in Southern Chile with 1251  
109 reported cases (14). However, the crude case fatality rate in Chile (1.4%) remains well below the  
110 global average (6.8%) (7, 10).

111 In this study we estimate the transmission potential of COVID-19, including the effective  
112 reproduction number, R, during the early transmission phase of the COVID-19 epidemic in Chile  
113 that can guide the magnitude and intensity of control interventions to combat the epidemic (15,  
114 16). Moreover, we can study the effectiveness of control interventions in Chile, including closure

115 of country borders, schools and non-essential businesses and the implementation of night time  
116 curfew among others (see Table 1) on the transmission rate by conducting short-term forecasts  
117 calibrated using the trajectory of the epidemic (17).

## 118 **Methods**

### 119 ***COVID-19 incidence and testing data***

120 We obtained updates on the daily series of COVID-19 cases as of April 28<sup>th</sup>, 2020 from  
121 the publicly available data from the Github repository created by the government of Chile (8).  
122 Incidence case data by the date of reporting, confirmed by PCR (polymerase chain reaction) tests  
123 from March 3<sup>rd</sup>–April 28<sup>th</sup>, 2020 were analyzed. The daily testing and positivity rates available  
124 from April 9<sup>th</sup>–April 28<sup>th</sup>, 2020 were also analyzed.

### 125 ***Generalized growth model (GGM)***

126 We generate short term forecasts in real time using the generalized growth model (GGM)  
127 that characterizes the early ascending phase of the epidemic by estimating two parameters: (1) the  
128 intrinsic growth rate,  $r$ ; and (2) a dimensionless “deceleration of growth” parameter,  $p$ . This model  
129 allows to capture a range of epidemic growth profiles, by modulating parameter  $p$ , including sub-  
130 exponential (polynomial) ( $0 < p < 1$ ) and exponential growth trends ( $p = 1$ ). The GGM model is  
131 given by the following differential equation:

$$132 \quad \frac{dC(t)}{dt} = C'(t) = rC(t)^p$$

133 In this equation  $C'(t)$  describes the incidence curve over time  $t$ ,  $C(t)$  describes the cumulative  
134 number of cases at time  $t$  and  $p \in [0, 1]$  is a “deceleration of growth” parameter. This equation  
135 becomes constant incidence over time if  $p = 0$  and an exponential growth model for cumulative  
136 cases if  $p = 1$ . Whereas if  $p$  is in the range  $0 < p < 1$ , then the model indicates sub-exponential growth  
137 dynamics (18, 19).

138 ***Sub-epidemic wave model***

139 We also fit the sub-epidemic model to the daily incidence of COVID-19, that depicts  
140 various profiles of overlapping sub-epidemics shaping the epidemic waves. This model  
141 characterizes each group sub-epidemic by a 3-parameter generalized logistic growth model (GLM)  
142 given by the following differential equation:

143 
$$\frac{dC(t)}{dt} = rC^p(t) \left(1 - \frac{C(t)}{K_o}\right)$$

144 In this equation  $\frac{dC(t)}{dt}$  describes the incidence curve over time  $t$ ,  $C(t)$  describes the cumulative  
145 number of cases at time  $t$ ,  $p \in [0, 1]$  is a “deceleration of growth” parameter,  $r$  is a positive growth  
146 rate parameter (1/time) and  $K_o$  is the final epidemic size. This model describes different early  
147 epidemic growth profiles, from constant incidence if  $p = 0$ , to sub-exponential/polynomial initial  
148 growth if  $0 < p < 1$ , and initial exponential growth dynamics if  $p = 1$ . Next, we model an epidemic  
149 wave comprising of  $n$  overlapping sub-epidemics given by the following system of coupled  
150 differential equation:

151 
$$\frac{dC_i(t)}{dt} = rA_{i-1}(t)C_i(t)^p \left(1 - \frac{C_i(t)}{K_i}\right), i = 1, \dots, n$$

152 In this equation  $C_i(t)$  describes the cumulative infection number for  $i^{\text{th}}$  sub-epidemic, and  $K_i$  is the  
153 size of sub-epidemic  $i$ , where  $i=1 \dots n$ . The equations are coupled through an indicator variable,  
154  $A_i(t)$  that models the onset timing of  $(i+1)^{\text{th}}$  sub-epidemic, making sure that sub-epidemics  
155 comprising an epidemic wave follow a regular structure. Therefore,

156

157 
$$A_i(t) = \begin{cases} 1 & C_i(t) > C_{thr} \\ 0 & \text{Otherwise} \end{cases} \quad i = 1, 2, 3, \dots, n - 1$$

158 where  $1 \leq C_{thr} < K_0$  and  $A_0(t) = 1$  for the sub-epidemic 1. Moreover, for the subsequently  
159 occurring sub-epidemics, the size of the  $i^{\text{th}}$  sub-epidemic ( $K_i$ ) declines exponentially at a rate  $q$   
160 because of multiple factors such as the effect of interventions, behavior changes and changes in  
161 disease transmission dependent on seasonality, we have,

$$162 \quad K_i = K_0 e^{-q(i-1)}, i = 1, 2, \dots, n,$$

163 where  $K_1 = K_0$  is the final size of sub-epidemic 1. If  $q = 0$ , then the model predicts an epidemic  
164 wave composed of subsequent sub-epidemics of equal size. If the epidemic wave is comprised by  
165 a single sub-epidemic, the model boils down to the 3-parameter generalized growth model whereas  
166 an epidemic wave comprised by two or more sub-epidemics is calibrated with 5  
167 parameters:  $r, p, K_0, q$  and  $C_{thr}$  (20).

### 168 ***Calibration of the GGM and sub-epidemic wave model***

169 We calibrate the GGM model and the sub-epidemic wave model to the daily incidence  
170 curve by dates of reporting in Chile using time series data that is available from March 3<sup>rd</sup>–March  
171 30<sup>th</sup>, 2020 and from March 3<sup>rd</sup>– April 28<sup>th</sup>, respectively.

172 Model parameters are estimated by a non-linear least square fitting of model solution to  
173 the incidence data by the date of reporting. This is achieved by searching for the set of model  
174 parameters  $\hat{\Theta} = (\Theta_1, \Theta_2, \dots, \Theta_m)$  that minimizes the sum of squared differences between the  
175 observed data  $y_{ti} = y_{t1}, y_{t2}, \dots, y_{tn}$  and the corresponding mean incidence curve given by  
176  $f(t_i, \Theta)$ : where  $\Theta = (r, p)$  correspond to an estimated set of parameters of the GGM model and  
177  $\Theta = (r, p, K_0, q, C_{thr})$  to an estimated set of parameters of the sub-epidemic wave model. In both  
178 cases, the objective function for the best fit solution of  $f(t_i, \Theta)$  is given by :

179

$$180 \quad \hat{\Theta} = \arg \min \sum_{i=1}^n (f(t_i, \Theta) - y_{t_i})^2$$



181 where  $t_i$  is the time stamp at which the time series data are observed and  $n$  is the total number of  
182 data points available for inference. The initial condition is fixed to the first observation in the data  
183 set. This way,  $f(t_i, \hat{\Theta})$  gives the best fit to the time series data  $y_{t_i}$ . Next, we utilize a parametric  
184 bootstrapping approach assuming Poisson error structure for the sub-epidemic model and the  
185 negative binomial error structure for the GGM model to derive uncertainty in the parameters  
186 obtained by non-linear least square fit of the data as previously described (18, 21). The model  
187 confidence intervals of parameters and the 95% prediction intervals of model fit are also obtained  
188 using the parametric bootstrap approach (18).

### 189 ***Reproduction number, R, from case incidence using GGM***

190 The reproduction number,  $R$ , is defined as the average number of secondary cases  
191 generated by a primary case during the early ascending phase of an outbreak. This is a crucial  
192 quantity to identify the intensity of interventions required to contain an epidemic (22, 23).  
193 Estimates of effective  $R$  indicate if the disease transmission continues ( $R > 1$ ) or if the active disease  
194 transmission ceases ( $R < 1$ ). Therefore, in order to contain an outbreak, we need to maintain  $R < 1$ .  
195 We estimate the reproduction number by calibrating the GGM to the early growth phase of the  
196 epidemic (28 days) (19). We model the generation interval of SARS-CoV-2 assuming gamma  
197 distribution with a mean of 4.41 days and a standard deviation of 3.17 days (24-28). We estimate  
198 the growth rate parameter,  $r$ , and the deceleration of growth parameter,  $p$ , as described above. Then  
199 we simulate the progression of incidence cases from the calibrated GGM model and apply the  
200 discretized probability distribution of the generation interval to the renewal equation (16):

201

202

$$R_{t_i} = \frac{I_i}{\sum_{j=0}^i (I_{i-j} \rho_j)}$$

203 In this equation, local incidence at calendar time  $t_i$  is denoted by  $I_i$  and the discretized probability  
204 distribution of the generation interval is denoted by  $\rho_i$ . The numerator represents the total new  
205 cases  $I_i$ , and the denominator represents the total number of cases that contribute to generating the  
206 new cases  $I_i$  at time  $t_i$ . This way,  $R_t$ , represents the average number of secondary cases generated  
207 by a single case at time  $t$ . Next, we derive the uncertainty bounds around the curve of  $R_t$  directly  
208 from the uncertainty associated with the parameter estimates ( $r$ ,  $p$ ). We estimate  $R_t$  for 300  
209 simulated curves assuming a negative binomial error structure (18).

## 210 **Results**

### 211 *Sub-epidemic model fit to case incidence data*

212 A total of 14365 cases were reported by the Ministry of Health Chile as of April 28<sup>th</sup>, 2020  
213 (8). On average  $\sim 441$  (SD: 81.3) new cases were reported between April 9<sup>th</sup>-April 28<sup>th</sup>, 2020.  
214 Figure 1 shows the daily incidence data of all confirmed cases in Chile as of April 28<sup>th</sup>, 2020. The  
215 sub-epidemic model fit to the daily series of case incidence shows an epidemic wave comprised  
216 of 3 sub epidemics, and parameter  $q$  is estimated to be low, suggesting stable incidence pattern  
217 (Figure 2). The figure shows that the sub-epidemic wave model captures successfully the case  
218 incidence trend in Chile as of April 28<sup>th</sup>, 2020 with an epidemic wave comprised by 3 sub-  
219 epidemics, and with the “deceleration of growth” parameter,  $p$ , estimated at 0.81 (95% CI: 0.77,  
220 0.84), the growth rate parameter,  $r$ , estimated at 0.69 (95% CI: 0.57, 0.86), the final size  $K_0$  of the  
221 first sub-epidemic estimated at  $1.01 * 10^4$  (95% CI:  $9.33 * 10^3$ ,  $1.09 * 10^4$ ), and the final size  
222 exponential growth rate,  $q$ , estimated at 0.0046 (95% CI:  $7.63 * 10^{-12}$ , 0.224).

### 223 *Initial growth dynamics and estimate of the reproduction number using GGM*

224 We estimate the reproduction number for the first 28 epidemic days incorporating the  
225 effects of the social distancing interventions as explained in Table 1. The incidence curve displays

226 sub-exponential growth dynamics with the scaling of growth parameter,  $p$ , estimated at 0.8 (95%  
227 CI: 0.7, 0.9) and the intrinsic growth rate,  $r$ , estimated at 0.8 (95% CI: 0.7, 0.9). The reproduction  
228 number for the early transmission phase was estimated at 1.6 (95% CI: 1.5, 1.6) (Figure 3).

### 229 *Assessing the impact of social distancing interventions*

230 To assess the impact of social distancing interventions in Chile given in Table 1, we  
231 generated a 20-days ahead forecast for Chile based on the daily incidence curve until March 30<sup>th</sup>,  
232 2020. The 28-day calibration period of the model yields an estimated growth rate,  $r$ , at 0.8 (95%CI:  
233 0.6, 1.0) and a scaling of growth rate parameter,  $p$ , at 0.8 (95%CI: 0.7,0.8). The 20-day ahead  
234 forecast suggests that the social distancing measures have significantly slowed down the spread of  
235 the virus in Chile, and whose effect is noticeable about two weeks after the implementation of an  
236 intervention as shown in Figure 4.

### 237 *COVID-19 testing rates and positivity rate*

238 Daily testing and positivity rates for the time period April 9<sup>th</sup>–April 28<sup>th</sup>, 2020 by the date  
239 of reporting are shown in Figure 5. The total number of tests performed for this time period were  
240 105654, amongst which 8819 had positive results. The average number of tests performed daily  
241 was estimated at ~4739 between April 9<sup>th</sup>–April 16<sup>th</sup>, 2020 and ~5645 between April 17<sup>th</sup>–April  
242 28<sup>th</sup>, 2020, a 19% increase. Subsequently, the positivity rate (percentage of positive tests among  
243 the total number of tests) fluctuated between 4.8 and 14.2% between April 9<sup>th</sup>–April 28<sup>th</sup>, 2020  
244 with an average positivity rate of 8.8% (SD:2.3).

### 245 **Discussion**

246 The current estimates of the early transmission potential in Chile for the first 28 days of  
247 the epidemic indicates sustained local transmission in the country with the estimate of reproduction  
248 number  $R$  at ~1.6 (95% CI: 1.5, 1.6) which is in accordance with the lower estimates of the

249 reproduction numbers from studies conducted in China, Brazil, Korea, Peru, South Africa and Iran  
250 that lie in the range of 1.5-7.1 (29-37). In contrast, the even lower estimates of  $R$  ( $<1$ ) that have  
251 been reported in Singapore and Australia can be correlated with the implementation of early social  
252 distancing interventions in these countries (38, 39).

253 The initial scaling of the growth parameter in Chile indicates a sub-exponential growth  
254 pattern ( $p \sim 0.8$ ), consistent with sub-exponential growth patterns of COVID-19 that have been  
255 observed in Singapore ( $p \sim 0.7$ ), Korea ( $p \sim 0.76$ ) and other Chinese provinces excluding Hubei  
256 ( $p \sim 0.67$ ) (34, 38, 40). In contrast, recent studies have reported nearly exponential growth pattern  
257 of the COVID-19 in Iran and Peru and an exponential growth pattern in China (31, 37, 40).

258 Although the initial transmission stage of COVID-19 in Chile has been attributed to  
259 multiple case importations, Chile was quick to implement control measures against the COVID-  
260 19 epidemic including border closures on March 18<sup>th</sup>, 2020 to prevent further case importations.  
261 The 20-day ahead forecast of our GGM model calibrated to 28 days suggest that the social  
262 distancing measures including closure of schools, universities and day cares have helped slow  
263 down the virus spread in the country by reducing population mobility (41). Moreover, the sub-  
264 epidemic model fit also indicates a stationary wave composed of three sub-epidemics, reaching a  
265 saturation point ( $\sim 550$ -580 cases) associated with the social distancing interventions in Chile. The  
266 cocktail of interventions including school closures, night time curfew and ban on social gatherings  
267 in Chile can be attributed to preventing the disease trend from growing exponentially in the early  
268 growth phase. The fluctuations in the case incidence in April, 2020 can be attributed to the  
269 weekend effect with more cases reported on Mondays. While, the COVID-19 case incidence  
270 exhibits a relative stabilization in case trajectory for the last two epidemic weeks (with an average

271 of ~441 cases per day), highlighting the positive effects of quarantine and lockdowns in the  
272 country, case counts continue to accrue.

273         Though the number of reported cases in Latin America remains low compared to the US  
274 and China, official data for many Latin American countries are incomplete. However, Chile has  
275 tested a higher percentage of its residents than any other Latin American nation lending confidence  
276 to its reliability (42). For instance, the average number of COVID-19 tests performed in Chile per  
277 day is ~5464, much higher compared to the neighboring South American country, Peru (~671 tests  
278 per day) (37). Moreover, the average positivity rate of COVID-19 in Chile is estimated at ~8.8%  
279 between April 9<sup>th</sup>-April 28<sup>th</sup>, 2020 due to the widespread testing in the country. This positivity rate  
280 for Chile is consistent with the positivity rates derived from Peru, Denmark, Germany and Canada  
281 (6-9%) (43). However, some countries like New Zealand, Australia and South Korea have reached  
282 even lower positivity rates (2-3%), with South Korea's large testing capacity combined with a  
283 strategy that tracks infected people via cell phones (42, 44). In comparison, Italy and the US have  
284 shown much higher positivity rates (15-20%) for COVID-19, indicating overall limited testing in  
285 these countries (45, 46). Moreover, studies suggest there is asymptomatic transmission of SARS-  
286 CoV-2, which means we could have underestimated our estimates based on the daily incidence's  
287 growth trend from symptomatic cases (47). Other studies have shown a substantial proportion of  
288 cases are not detected by surveillance systems that results in the underestimation of epidemic  
289 growth curve (48). On the other hand, relative transmission of asymptomatic cases in Chile is also  
290 unknown (49, 50). While our study highlights the effectiveness of control interventions in Chile,  
291 it also underscores the need for persistent isolation and social distancing measures to stomp all  
292 active disease transmission chains in Chile.

293           This study has some limitations. First our study analyzes cases by the dates of reporting  
294 while it is ideal to analyze the cases by the dates of onset or after adjusting for reporting delays.  
295 On the other hand, a substantial fraction of the COVID-19 infections exhibit very mild or no  
296 symptoms at all, which may not be reflected by data (26). Second, the data is not stratified by local  
297 vs. imported cases, therefore, we assume that all cases contribute equally to the transmission  
298 dynamics of COVID-19. Finally, the extent of selective underreporting, and its impact on these  
299 results, is difficult to assess.

### 300 **Conclusion**

301           In this study we estimate the early transmission potential of SARS-CoV-2 in Chile. Our  
302 current findings point to sustained transmission of SARS-CoV-2 in the early phase of the outbreak,  
303 with our estimate of the reproduction number at  $\sim 1.6$ . The COVID-19 epidemic in Chile followed  
304 an early sub-exponential growth trend. While the social distancing interventions have slowed the  
305 virus spread, the number of new COVID-19 cases continue to accumulate, underscoring the need  
306 for persistent social distancing and active case finding efforts to bring the epidemic under control.

### 307 **Acknowledgments**

308 Not applicable

### 309 **Disclaimers**

310 Not applicable

### 311 **Author Bio**

312 Amna Tariq is a PhD student in the Department of Population Health Science, School of Public  
313 Health, Georgia State University, Atlanta, GA. Her primary research focus is mathematical  
314 modeling and quantitative analysis of infectious diseases and emerging epidemics .

### 315 **List of abbreviations**

316 COVID-19

317 SARS-CoV-2

318 PCR

319 WHO

## 320 **Conflict of Interest**

321 The authors declare no conflicts of interest.

## 322 **References**

323 1. WHO. WHO Director-General's opening remarks at the media briefing on COVID-19-11  
324 March 2020 World Health Organization2020 [April]. Available from: <https://bit.ly/2A8aCIO>.

325 2. Dong E, Du H, Gardner L. An interactive web-based dashboard to track COVID-19 in  
326 real time. The Lancet Infectious Diseases. 2020;20(5):533-4. doi: 10.1016/S1473-  
327 3099(20)30120-1.

328 3. Bank W. The Economy in the Time of Covid-19. LAC Semiannual Report. Washington,  
329 DC: World Bank: 2020 April. Report No.

330 4. Okada P, Buathong R, Phuygun S, Thanadachakul T, Parnmen S, Wongboot W, et al.  
331 Early transmission patterns of coronavirus disease 2019 (COVID-19) in travellers from Wuhan  
332 to Thailand, January 2020. Euro surveillance : bulletin Europeen sur les maladies transmissibles  
333 = European communicable disease bulletin. 2020;25(8). Epub 2020/03/05. doi: 10.2807/1560-  
334 7917.Es.2020.25.8.2000097. PubMed PMID: 32127124; PubMed Central PMCID:  
335 PMC7055038.

336 5. Spiteri G, Fielding J, Diercke M, Campese C, Enouf V, Gaymard A, et al. First cases of  
337 coronavirus disease 2019 (COVID-19) in the WHO European Region, 24 January to 21 February

- 338 2020. Euro surveillance : bulletin Europeen sur les maladies transmissibles = European  
339 communicable disease bulletin. 2020;25(9):2000178. doi: 10.2807/1560-  
340 7917.ES.2020.25.9.2000178. PubMed PMID: 32156327.
- 341 6. Holshue ML, DeBolt C, Lindquist S, Lofy KH, Wiesman J, Bruce H, et al. First Case of  
342 2019 Novel Coronavirus in the United States. New England Journal of Medicine.  
343 2020;382(10):929-36. doi: 10.1056/NEJMoa2001191.
- 344 7. WHO. Situation Reports Coronavirus World Health Organization2020 [March 5].  
345 Available from: [https://www.who.int/emergencies/diseases/novel-coronavirus-2019/situation-](https://www.who.int/emergencies/diseases/novel-coronavirus-2019/situation-reports)  
346 [reports](https://www.who.int/emergencies/diseases/novel-coronavirus-2019/situation-reports).
- 347 8. Government of Chile M. MinScience/ Data-COVID19  
348 2020 [cited 2020 April 25]. Available from: <https://github.com/MinCiencia/Datos-COVID19>.
- 349 9. Chile Gd. Chile enters the Stage 4 Coronavirus transmission scenario and President  
350 Piñera announces the closure of the borders and secures the supply chain. Gob.cl: 2020 March  
351 16. Report No.
- 352 10. MOH. Cifras Oficiales COVID-19', Ministry of Health, Plan de Acción Coronavirus  
353 COVID-19 2020 [April 2]. Available from: <https://www.gob.cl/coronavirus/cifrasoficiales/>.
- 354 11. Cambero F. Chile bans large public events over coronavirus fears, ahead of planned  
355 protests. Reuters. 2020 March 13.
- 356 12. Pública MdIyS. Declares status of constitutional exception of catastrophe, by public  
357 calamity, in the territory of Chile Biblioteca del Congreso Nacional de Chile. 2020. Available  
358 from: <https://www.leychile.cl/Navegar?idNorma=1143580&idVersion=2020-03-26&idParte=>.



- 359 13. MOH. Dispone medidas sanitarias que indica por brote de COVID-19. Norms 1143498,  
360 1143591, 1746958, 1143651, 1143645 Biblioteca del Congreso Nacional de Chile 2020.  
361 Available from: <https://www.leychile.cl/N?i=1143498&f=2020-04-04&p=>.
- 362 14. Gob.cl. Official figures COVID-19 2020 [cited 2020 April 24]. Available from:  
363 <https://www.gob.cl/coronavirus/cifrasoficiales/#reportes>.
- 364 15. Nishiura H, Chowell G. Early transmission dynamics of Ebola virus disease (EVD), West  
365 Africa, March to August 2014. Euro surveillance : bulletin Europeen sur les maladies  
366 transmissibles = European communicable disease bulletin. 2014;19(36). Epub 2014/09/19.  
367 PubMed PMID: 25232919.
- 368 16. Nishiura H, Chowell G. The Effective Reproduction Number as a Prelude to Statistical  
369 Estimation of Time-Dependent Epidemic Trends. Springer, editor 2009. 103-12 p.
- 370 17. Shanafelt DW, Jones G, Lima M, Perrings C, Chowell G. Forecasting the 2001 Foot-and-  
371 Mouth Disease Epidemic in the UK. Ecohealth. 2018;15(2):338-47. Epub 2017/12/13. doi:  
372 10.1007/s10393-017-1293-2. PubMed PMID: 29238900.
- 373 18. Chowell G. Fitting dynamic models to epidemic outbreaks with quantified uncertainty: A  
374 primer for parameter uncertainty, identifiability, and forecasts. Infectious Disease Modelling.  
375 2017;2(3):379-98. doi: <https://doi.org/10.1016/j.idm.2017.08.001>.
- 376 19. Viboud C, Simonsen L, Chowell G. A generalized-growth model to characterize the early  
377 ascending phase of infectious disease outbreaks. Epidemics. 2016;15:27-37. doi:  
378 <https://doi.org/10.1016/j.epidem.2016.01.002>.
- 379 20. Chowell G, Tariq A, Hyman JM. A novel sub-epidemic modeling framework for short-  
380 term forecasting epidemic waves. BMC Medicine. 2019;17(1):164. doi: 10.1186/s12916-019-  
381 1406-6.

- 382 21. Chowell G, Ammon CE, Hengartner NW, Hyman JM. Transmission dynamics of the  
383 great influenza pandemic of 1918 in Geneva, Switzerland: Assessing the effects of hypothetical  
384 interventions. *Journal of Theoretical Biology*. 2006;241(2):193-204. doi:  
385 <https://doi.org/10.1016/j.jtbi.2005.11.026>.
- 386 22. Anderson RM, May RM. *Infectious Diseases of Humans*. Oxford, editor. Oxford  
387 Univeristy Press1991.
- 388 23. Nishiura H, Chowell G, Heesterbeek H, Wallinga J. The ideal reporting interval for an  
389 epidemic to objectively interpret the epidemiological time course. *J R Soc Interface*.  
390 2010;7(43):297-307. Epub 2009/07/01. doi: 10.1098/rsif.2009.0153. PubMed PMID: 19570792.
- 391 24. Nishiura H, Linton NM, Akhmetzhanov AR. Serial interval of novel coronavirus (2019-  
392 nCoV) infections. medRxiv. 2020:2020.02.03.20019497. doi: 10.1101/2020.02.03.20019497.
- 393 25. You C, Deng Y, Hu W, Sun J, Lin Q, Zhou F, et al. Estimation of the Time-Varying  
394 Reproduction Number of COVID-19 Outbreak in China. medRxiv. 2020:2020.02.08.20021253.  
395 doi: 10.1101/2020.02.08.20021253.
- 396 26. Tindale L, Coombe M, Stockdale JE, Garlock E, Lau WYV, Saraswat M, et al.  
397 Transmission interval estimates suggest pre-symptomatic spread of COVID-19. medRxiv.  
398 2020:2020.03.03.20029983. doi: 10.1101/2020.03.03.20029983.
- 399 27. Du Z, Xu X, Wu Y, Wang L, Cowling BJ, Meyers LA. The serial interval of COVID-19  
400 from publicly reported confirmed cases. medRxiv. 2020:2020.02.19.20025452. doi:  
401 10.1101/2020.02.19.20025452.
- 402 28. Du Z, Xu x, Wu Y, Wang L, Cowling BJ, Meyers LA. COVID-19 serial interval  
403 estimates based on confirmed cases in public reports from 86 Chinese cities. medRxiv.  
404 2020:2020.04.23.20075796. doi: 10.1101/2020.04.23.20075796.

- 405 29. Read JM, Bridgen JR, Cummings DA, Ho A, Jewell CP. Novel coronavirus 2019-nCoV:  
406 early estimation of epidemiological parameters and epidemic predictions. medRxiv.  
407 2020:2020.01.23.20018549. doi: 10.1101/2020.01.23.20018549.
- 408 30. Wu JT, Leung K, Leung GM. Nowcasting and forecasting the potential domestic and  
409 international spread of the 2019-nCoV outbreak originating in Wuhan, China: a modelling study.  
410 The Lancet. 2020. doi: 10.1016/S0140-6736(20)30260-9.
- 411 31. Muniz-Rodriguez K, Fung IC-H, Ferdosi SR, Ofori SK, Lee Y, Tariq A, et al.  
412 Transmission potential of COVID-19 in Iran. medRxiv. 2020:2020.03.08.20030643. doi:  
413 10.1101/2020.03.08.20030643.
- 414 32. Mizumoto K, Kagaya K, Chowell G. Early epidemiological assessment of the  
415 transmission potential and virulence of coronavirus disease 2019 (COVID-19) in Wuhan City:  
416 China, January-February, 2020. medRxiv. 2020:2020.02.12.20022434. doi:  
417 10.1101/2020.02.12.20022434.
- 418 33. Hwang J, Park H, Kim S-H, Jung J, Kim N. Basic and effective reproduction numbers of  
419 COVID-19 cases in South Korea excluding Sincheonji cases. medRxiv.  
420 2020:2020.03.19.20039347. doi: 10.1101/2020.03.19.20039347.
- 421 34. Shim E, Tariq A, Choi W, Lee Y, Chowell G. Transmission potential and severity of  
422 COVID-19 in South Korea. International Journal of Infectious Diseases. 2020;93:339-44. doi:  
423 10.1016/j.ijid.2020.03.031.
- 424 35. Felix FHC, Fontenele JB. Instantaneous R calculation for COVID-19 epidemic in Brazil.  
425 medRxiv. 2020:2020.04.23.20077172. doi: 10.1101/2020.04.23.20077172.
- 426 36. Mbuyha R, Marwala T. Bayesian Inference of COVID-19 Spreading Rates in South  
427 Africa. medRxiv. 2020:2020.04.28.20083873. doi: 10.1101/2020.04.28.20083873.

- 428 37. Munayco CV, Tariq A, Soto-Cabezas GG, Reyes MF, Valle A, Rojas-Mezarina L, et al.  
429 Early transmission dynamics and control of COVID-19 in Lima-Peru, 2020. Infectious Disease  
430 Modelling. 2020.
- 431 38. Tariq A, Lee Y, Roosa K, Blumberg S, Yan P, Ma S, et al. Real-time monitoring the  
432 transmission potential of COVID-19 in Singapore, March 2020. medRxiv.  
433 2020:2020.02.21.20026435. doi: [10.1101/2020.02.21.20026435](https://doi.org/10.1101/2020.02.21.20026435).
- 434 39. Price DJ, Shearer FM, Meehan MT, McBryde E, Moss R, Golding N, et al. Early analysis  
435 of the Australian COVID-19 epidemic. medRxiv. 2020:2020.04.25.20080127. doi:  
436 [10.1101/2020.04.25.20080127](https://doi.org/10.1101/2020.04.25.20080127).
- 437 40. Roosa K, Lee Y, Luo R, Kirpich A, Rothenberg R, Hyman JM, et al. Real-time forecasts  
438 of the COVID-19 epidemic in China from February 5th to February 24th, 2020. Infectious  
439 Disease Modelling. 2020;5:256-63. doi: <https://doi.org/10.1016/j.idm.2020.02.002>.
- 440 41. Cuadrado C, Monsalves MJ, Gajardo J, Bertoglia MP, Najera M, Alfaro T, et al. Impact  
441 of small-area lockdowns for the control of the COVID-19 pandemic. medRxiv.  
442 2020:2020.05.05.20092106. doi: [10.1101/2020.05.05.20092106](https://doi.org/10.1101/2020.05.05.20092106).
- 443 42. Thomson E, Sanders P. Chile Charts New Path With Rolling Lockdowns, Immunity  
444 Cards. Bloomberg. 2020 April 22.
- 445 43. Meyer R, C.Madrigal A. A New Statistic Reveals Why America's COVID-19 Numbers  
446 Are Flat. The Atlantic. 2020 April 16.
- 447 44. Buchanan L, Lai KKR, McCann A. U.S. Lags in Coronavirus Testing After Slow  
448 Response to Outbreak. The New York Times. 2020 March 17.
- 449 45. Project CT. The COVID-19 tracking project 2020 [May 1]. Available from:  
450 <https://covidtracking.com/about-project>.

- 451 46. Asahi K, Undurraga EA, Wagner R. Benchmarking the CoVID-19 pandemic across  
452 countries and states in the U.S.A. under heterogeneous testing. medRxiv.  
453 2020:2020.05.01.20087882. doi: 10.1101/2020.05.01.20087882.
- 454 47. Mayorga L, García Samartino C, Flores G, Masuelli S, Sánchez MV, Mayorga LS, et al.  
455 Detection and isolation of asymptomatic individuals can make the difference in COVID-19  
456 epidemic management. medRxiv. 2020:2020.04.23.20077255. doi:  
457 10.1101/2020.04.23.20077255.
- 458 48. Li R, Pei S, Chen B, Song Y, Zhang T, Yang W, et al. Substantial undocumented  
459 infection facilitates the rapid dissemination of novel coronavirus (SARS-CoV-2). Science (New  
460 York, NY). 2020;368(6490):489-93. Epub 2020/03/18. doi: 10.1126/science.abb3221. PubMed  
461 PMID: 32179701; PubMed Central PMCID: PMC7164387.
- 462 49. Nishiura H, Kobayashi T, Miyama T, Suzuki A, Jung SM, Hayashi K, et al. Estimation of  
463 the asymptomatic ratio of novel coronavirus infections (COVID-19). Int J Infect Dis.  
464 2020;94:154-5. Epub 2020/03/18. doi: 10.1016/j.ijid.2020.03.020. PubMed PMID: 32179137.
- 465 50. Mizumoto K, Kagaya K, Zarebski A, Chowell G. Estimating the asymptomatic  
466 proportion of coronavirus disease 2019 (COVID-19) cases on board the Diamond Princess cruise  
467 ship, Yokohama, Japan, 2020. Euro surveillance : bulletin Europeen sur les maladies  
468 transmissibles = European communicable disease bulletin. 2020;25(10):2000180. doi:  
469 10.2807/1560-7917.ES.2020.25.10.2000180. PubMed PMID: 32183930.
- 470
- 471 **Address for correspondence:** Amna Tariq, Department of Population Health Sciences, Georgia  
472 State University School of Public Health, Atlanta GA, 30303 email: [atariq1@student.gsu.edu](mailto:atariq1@student.gsu.edu)  
473 Contact number: 470-985-6352

474 Table 1. Timeline of the implementation of the social distancing interventions in Chile as of April  
475 28th, 2020.

| Date             | Control interventions                                                                                                                                                         |
|------------------|-------------------------------------------------------------------------------------------------------------------------------------------------------------------------------|
| March 13th, 2020 | Ban on large social gatherings implemented in Chile (11)                                                                                                                      |
| March 16th, 2020 | Closures of day care, schools and universities in Chile (12, 13)<br><br>Mandatory quarantine of high risk individuals returning from Iran, China, West Europe and South Korea |
| March 18th, 2020 | Declaration of national emergency<br><br>Closure of country borders (12, 13)<br><br>Telework implemented                                                                      |
| March 19th, 2020 | Closure of mall and department stores with the exception of supermarkets, pharmacies, banks and grocery stores (13)                                                           |
| March 21st, 2020 | Closure of non-essential business including theatres, restaurant, bars and gyms (13)                                                                                          |
| March 22nd, 2020 | Night time curfew implemented (13)                                                                                                                                            |
| March 26th, 2020 | Intermittent lockdown initiated (implemented at municipality level) (13)                                                                                                      |
| April 8th, 2020  | Orders on mandatory use of facemasks in public transport (10)                                                                                                                 |
| April 17th, 2020 | Orders on mandatory use of facemasks in all public spaces (10)                                                                                                                |

476

477

478

479

480

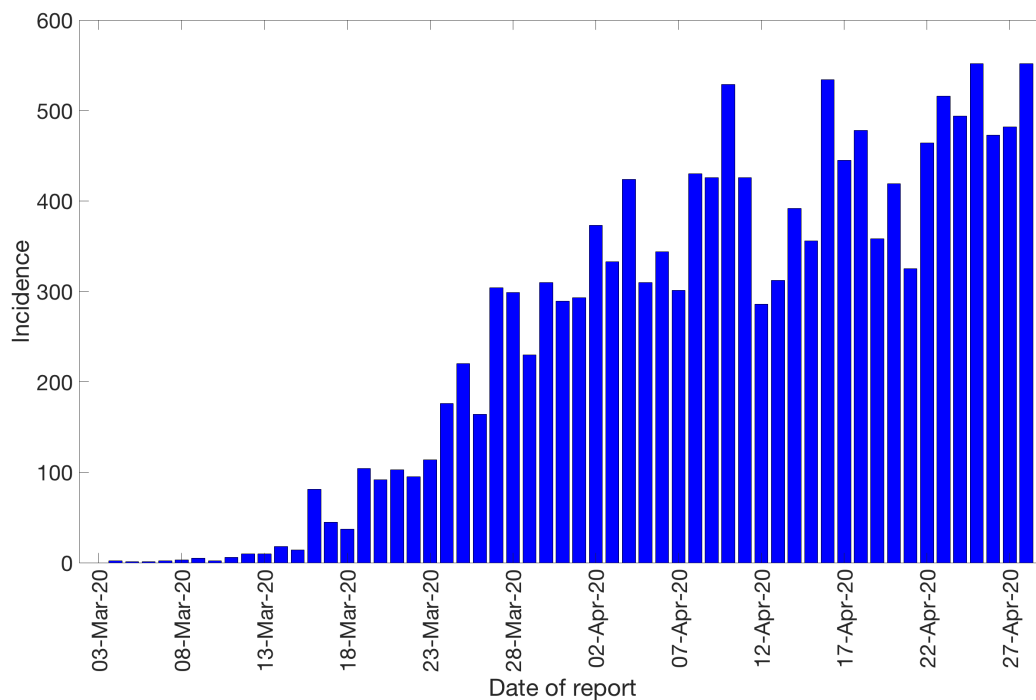

481  
482 Figure 1: Daily incidence curve for all COVID-19 confirmed cases in Chile as of April 28<sup>th</sup>, 2020

483 (9).

484  
485  
486  
487  
488  
489  
490  
491  
492  
493  
494

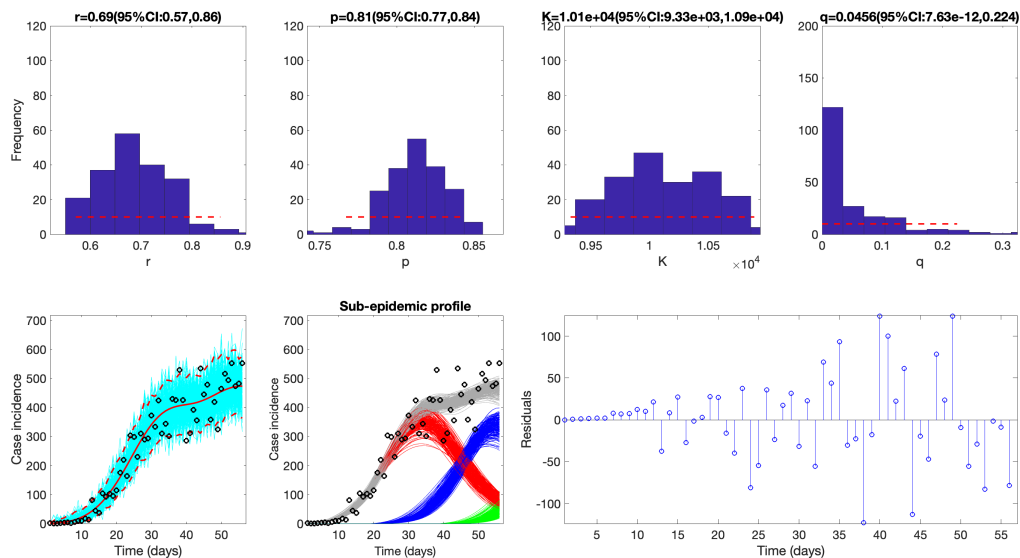

495

496 Figure 2: Best fit of the sub-epidemic wave model to the COVID-19 epidemic in Chile as of April  
497 28<sup>th</sup>, 2020. Our results predict an epidemic wave comprised by 3 sub-epidemics. The top panels  
498 display the empirical distribution of the parameter estimates ( $r$ ,  $p$ ,  $K_0$ ,  $q$ ). Bottom panels show the  
499 model fit (left), the sub-epidemic profile (center), and the residuals (right). Black circles  
500 correspond to the data points. The best model fit (solid red line) and 95% prediction interval  
501 (dashed red lines) are also shown. Cyan curves are the associated uncertainty from individual  
502 bootstrapped curves assuming a Poisson error structure. Different sub-epidemics comprising the  
503 epidemic wave are plotted using different colors.

504

505

506

507

508

509

510



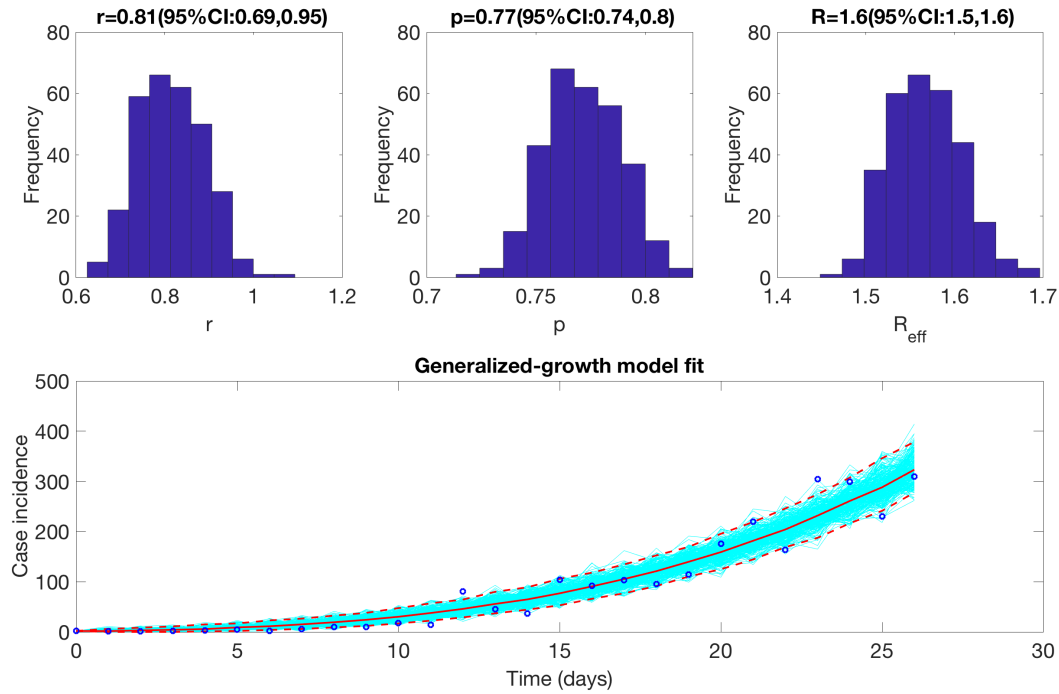

511

512 Figure 3: Reproduction number with 95% CI estimated using the GGM. The estimated  
513 reproduction number of the COVID-19 epidemic in Chile as of March 29<sup>th</sup>, 2020 is, 1.6 (95% CI:  
514 1.5, 1.6).

515

516

517

518

519

520

521

522

523

524

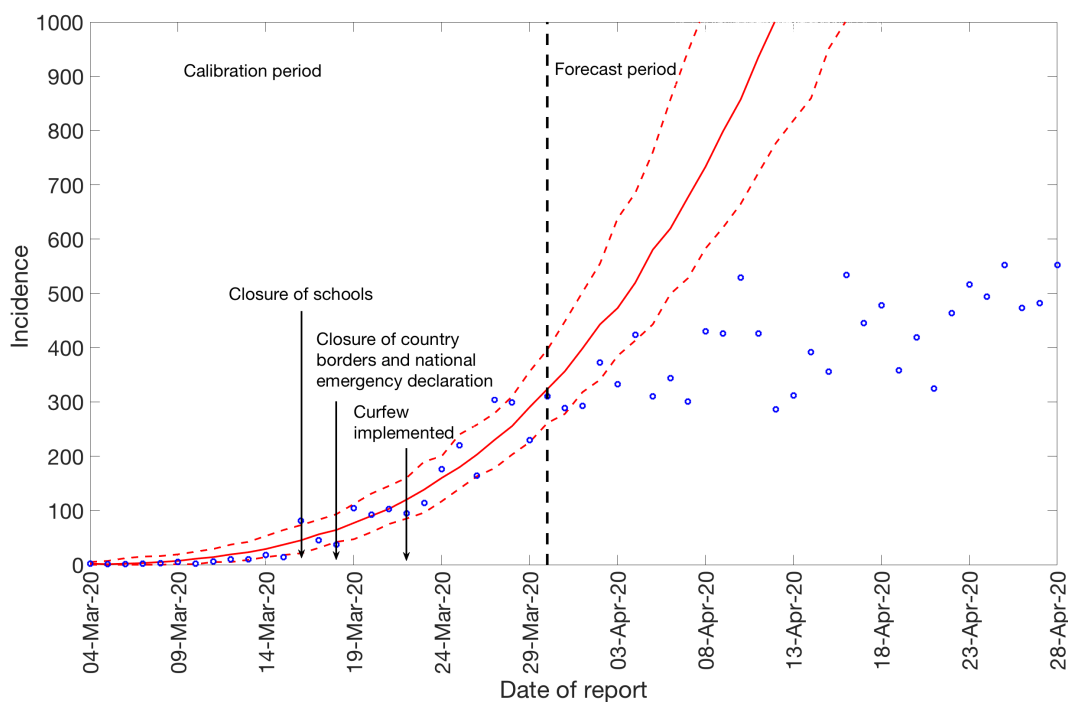

525  
526 Figure 4: 20-days ahead forecast of the COVID-19 epidemic in Chile by calibrating the GGM  
527 until March 30<sup>th</sup>, 2020. Blue circles correspond to the data points, the red solid line indicates the  
528 best model fit and the red dashed lines represent the 95% prediction interval. The vertical black  
529 dashed line represents the time of the start of the forecast period.

530  
531  
532  
533  
534  
535  
536  
537  
538

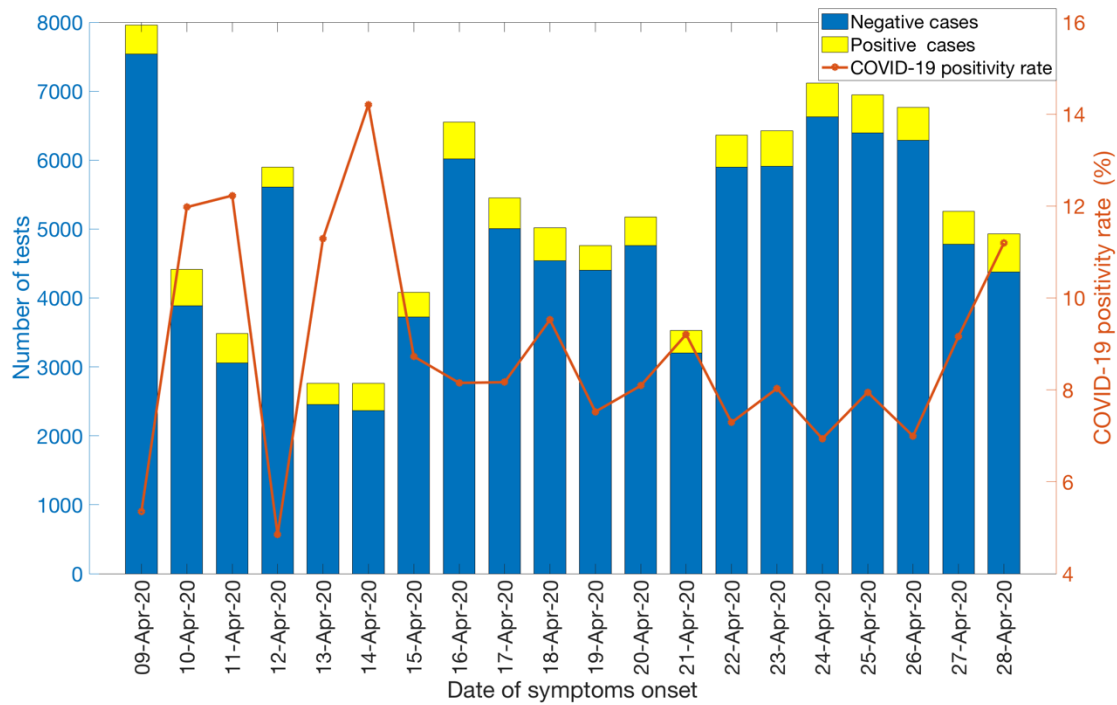

539

540 Figure 5: Laboratory results for the COVID-19 tests conducted in Chile as of April 28<sup>th</sup>, 2020.

541 Blue color represents the negative test results and the yellow color represents the positive test

542 results. The orange solid line represents the positivity rate of COVID-19 in Chile.
